# Supplementary material for: Sex-Specific Effects on Total Body Fat Gain with 4-Week Daily Dosing of Raspberry Ketone [4-(4-Hydroxyphenyl)-2-butanone] and Ketogenic Diet in Mice
Source: MDPI journal article supplement (doi:10.3390/nu15071630), 2023-03-28
Supplement: s1 [file s1]

## Article

# Sex-Specific Effects on Total Body Fat Gain with 4-Week Daily Dosing of Raspberry Ketone [4-(4-Hydroxyphenyl)-2-butanone] and Ketogenic Diet in Mice

Lihong Hao and Nicholas T. Bello \*

Department of Animal Sciences, School of Environmental and Biological Sciences, Rutgers, The State University of New Jersey, New Brunswick, NJ 08901, USA; haoli@sebs.rutgers.edu

\* Correspondence: ntbello@sebs.rutgers.edu

**Citation:** Hao, L.; Bello, N.T. Sex-Specific Effects on Total Body Fat Gain with 4-Week Daily Dosing of Raspberry Ketone [4-(4-Hydroxyphenyl)-2-butanone] and Ketogenic Diet in Mice. *Nutrients* **2023**, *15*, 1630. <https://doi.org/10.3390/nu15071630>

Academic Editor: Fabio Galvano

Received: 8 February 2023

Revised: 16 March 2023

Accepted: 21 March 2023

Published: 28 March 2023

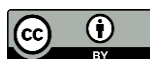

**Copyright:** © 2023 by the authors. Licensee MDPI, Basel, Switzerland. This article is an open access article distributed under the terms and conditions of the Creative Commons Attribution (CC BY) license (<https://creativecommons.org/licenses/by/4.0/>).

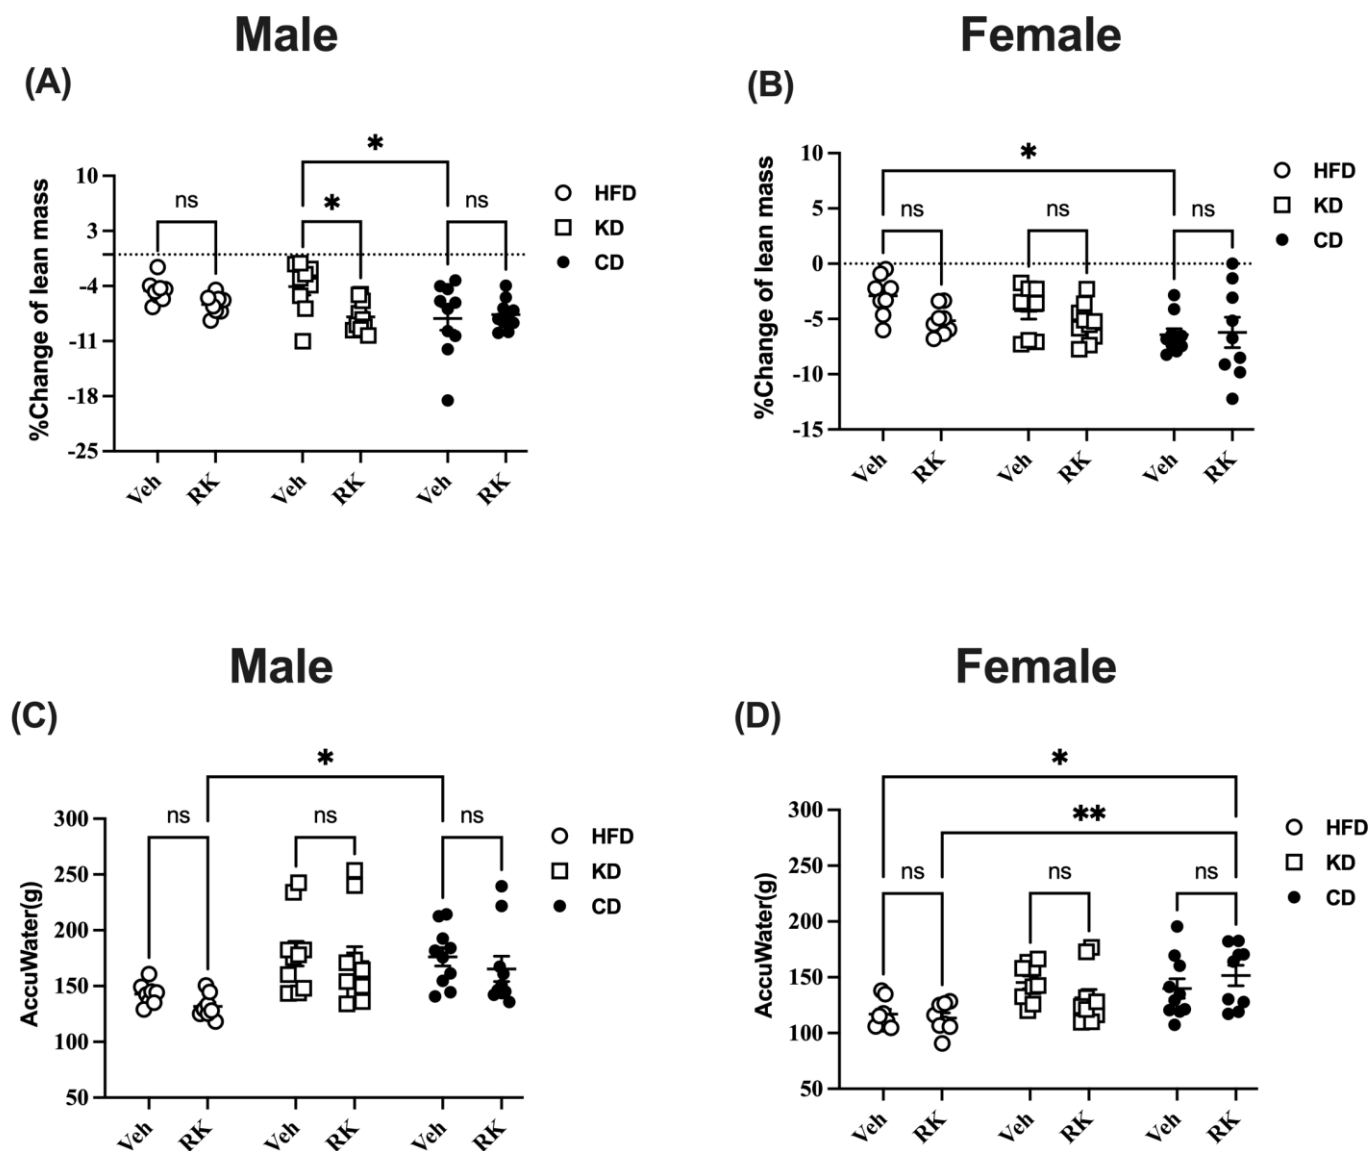

**Figure S1.** Percentage change of lean mass (A, B) and accumulated water intake (C, D) in overweight/obese male and female mice after 4 weeks of daily dosing and diet feeding. \*  $p < 0.05$ ; \*\*  $p < 0.01$ ; ns, not significant. Two-way analysis of variance (ANOVA) followed by Newman Keul post hoc tests when justified;  $p < 0.05$  was considered statistically significant. N=8-10 mice/group. high fat diet (45%fat), HFD; ketogenic diet (80%fat), KD; control diet (10%fat), CD; vehicle, Veh; raspberry ketone, RK; accumulated water intake, AccuWater.

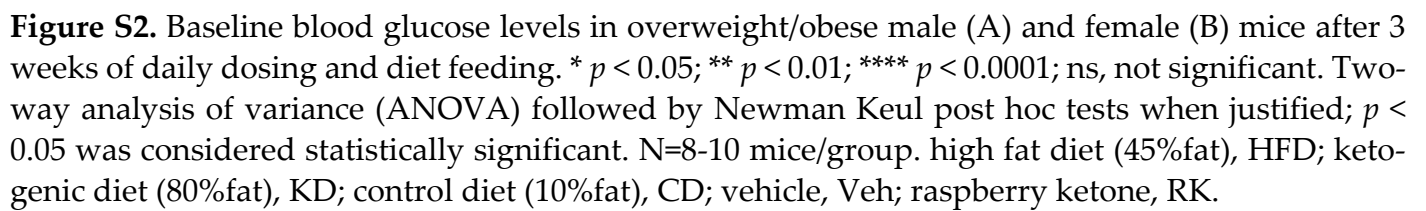

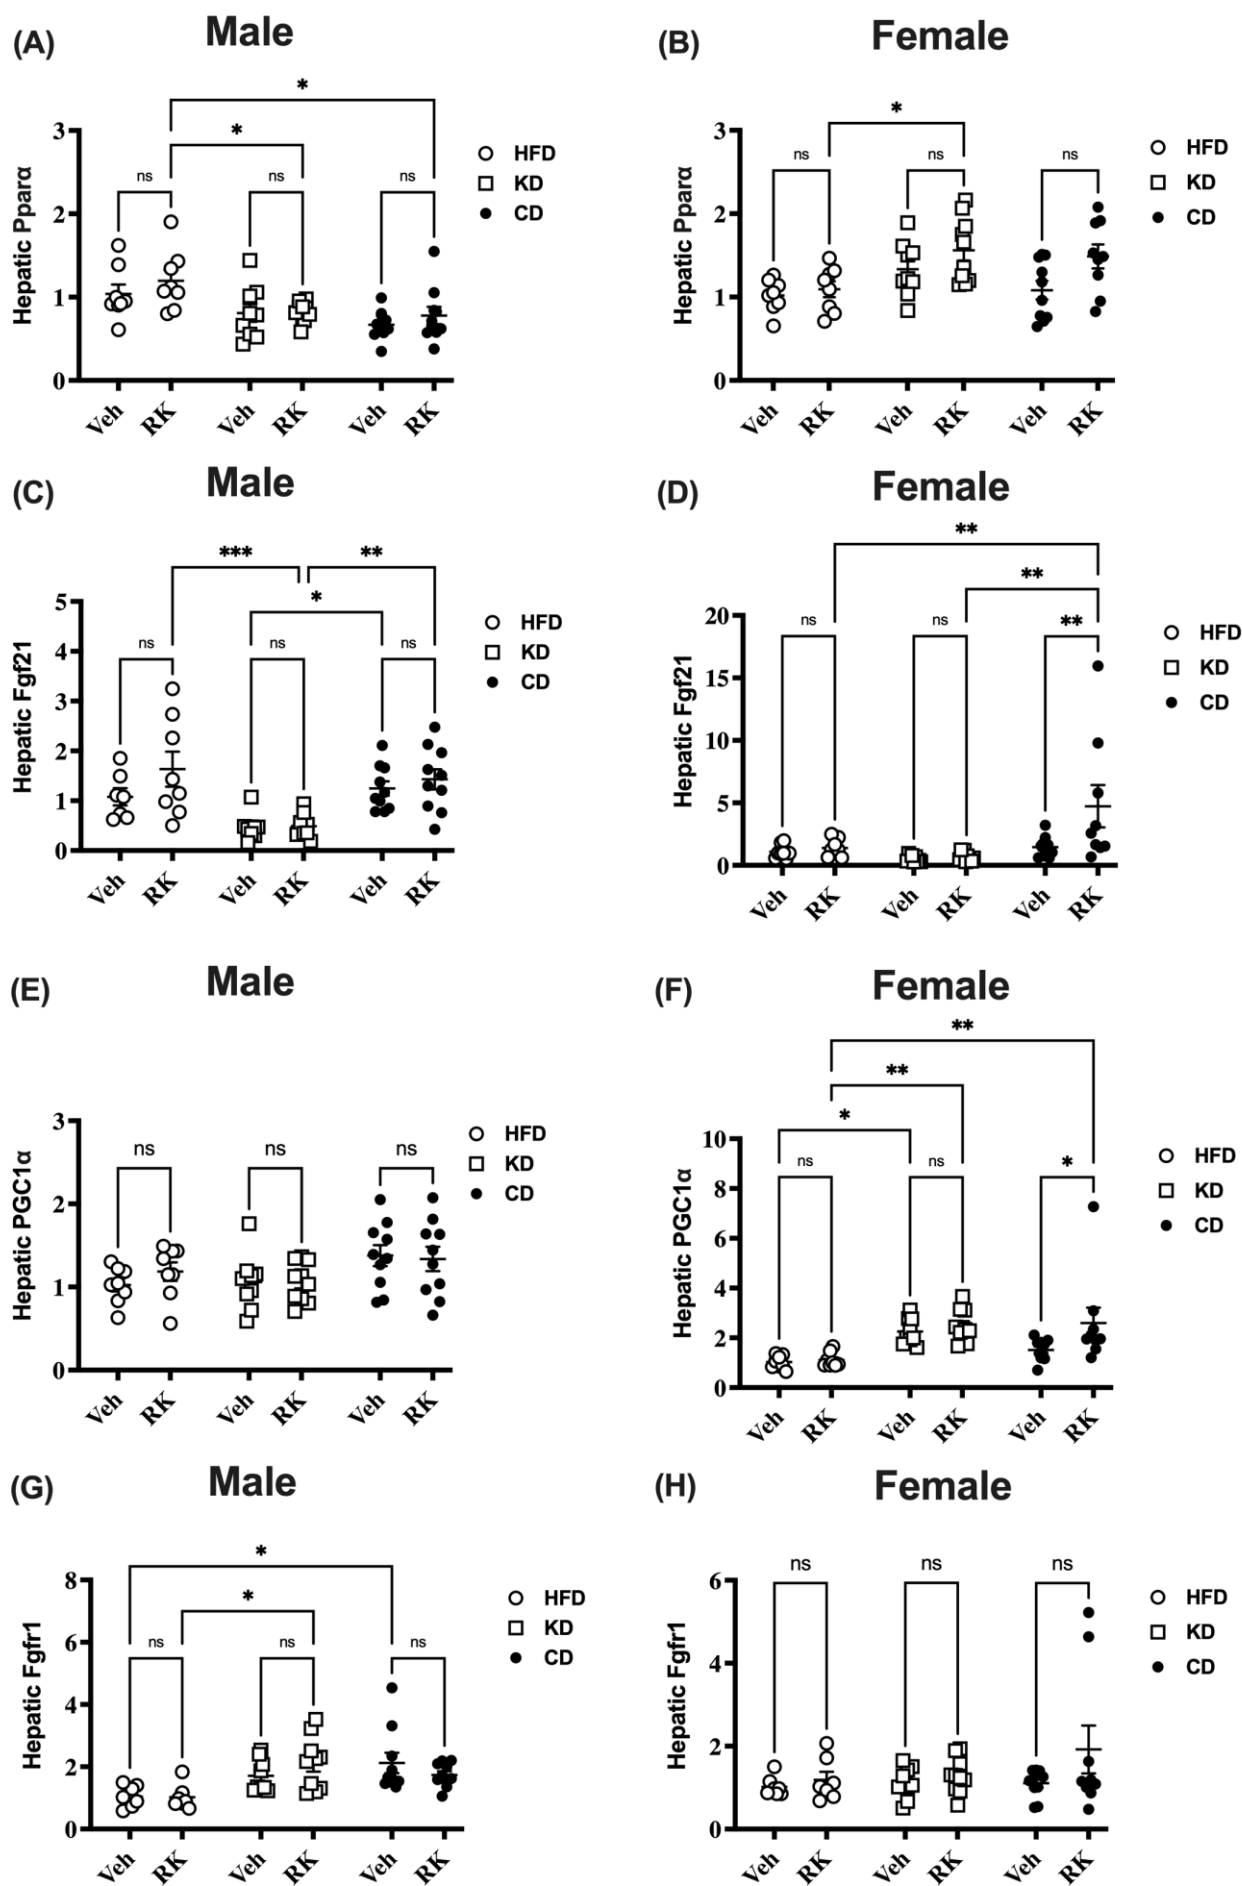

**Figure S3.** Hepatic gene expression of peroxisome proliferator-activated receptor alpha (*Ppara*) (A, B), fibroblast growth factor 21 (*Fgf21*) (C, D), peroxisome proliferator-activated receptor-gamma coactivator (PGC)-1alpha (*PGC1α*) (E, F) and fibroblast growth factor receptor (*Fgfr1*) (G, H) in overweight/obese male and female mice after 4 weeks of daily dosing and diet feeding. \*  $p < 0.05$ ; \*\*  $p < 0.01$ ; \*\*\*  $p < 0.001$ ; ns, not significant. Two-way analysis of variance (ANOVA) followed by Newman Keul post hoc tests when justified;  $p < 0.05$  was considered statistically significant. N=8-10 mice/group. high fat diet (45%fat), HFD; ketogenic diet (80%fat), KD; control diet (10%fat), CD; vehicle, Veh; raspberry ketone, RK.
